# Supplementary material for: A Cell-Based Optimised Approach for Rapid and Efficient Gene Editing of Human Pluripotent Stem Cells
Source: MDPI journal article supplement (doi:10.3390/ijms241210266), 2023-06-17
Supplement: s1 [file s1]

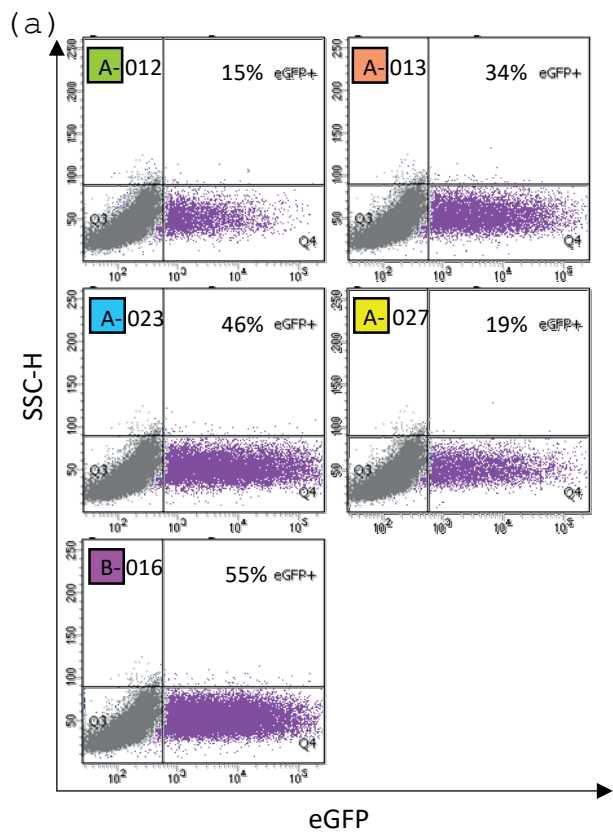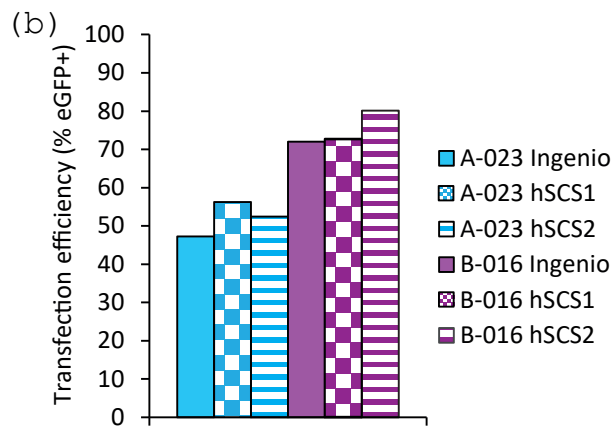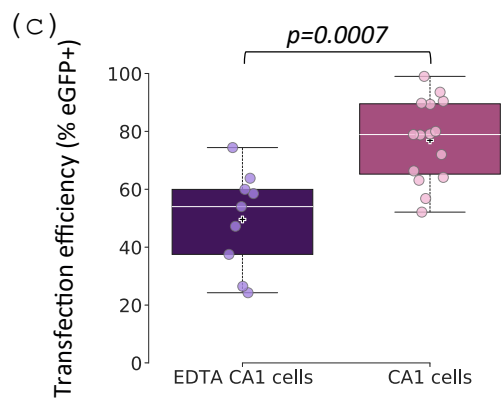

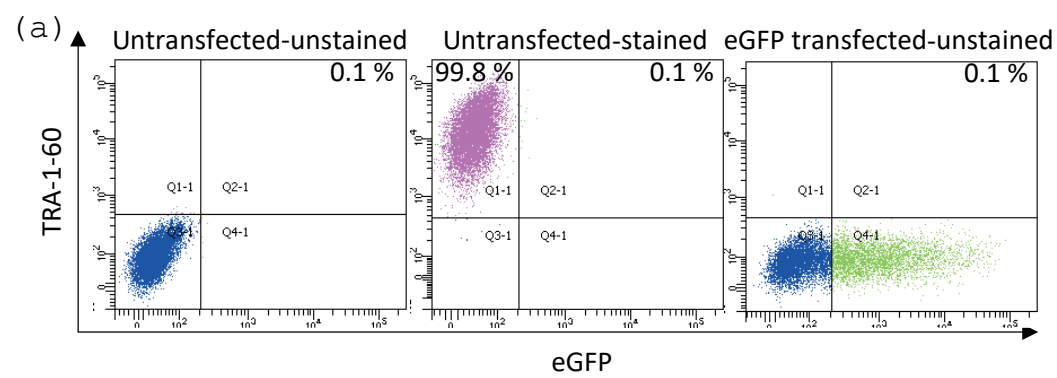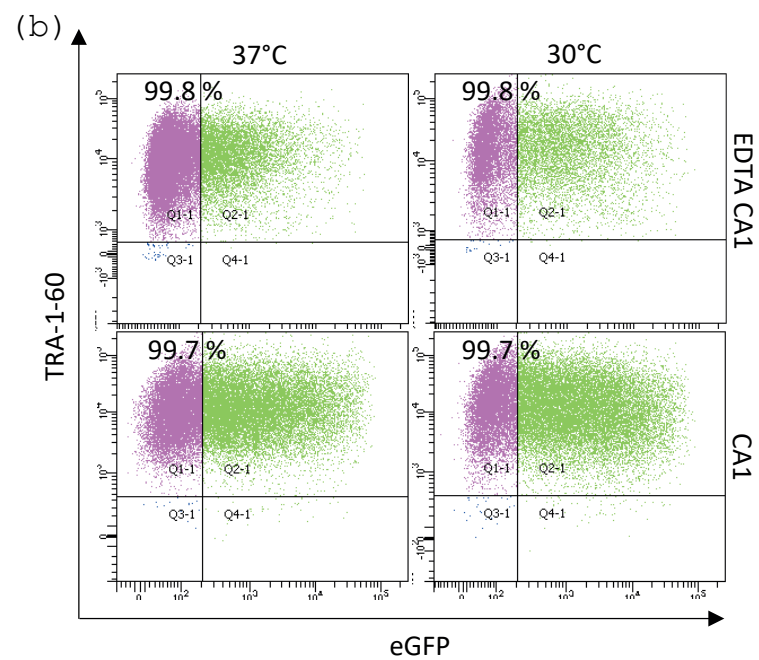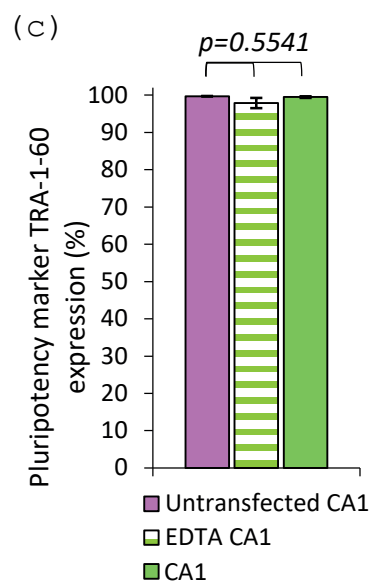

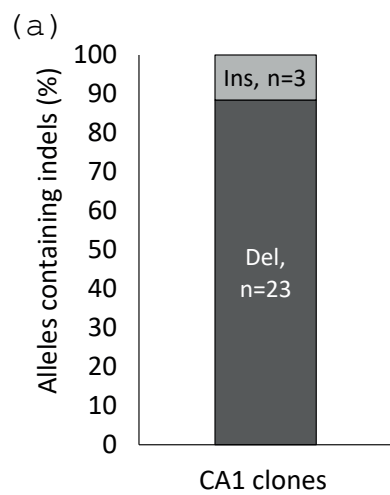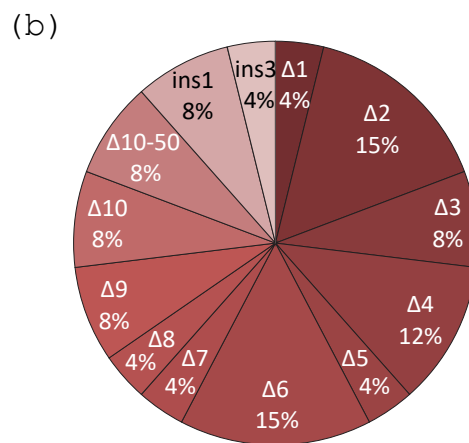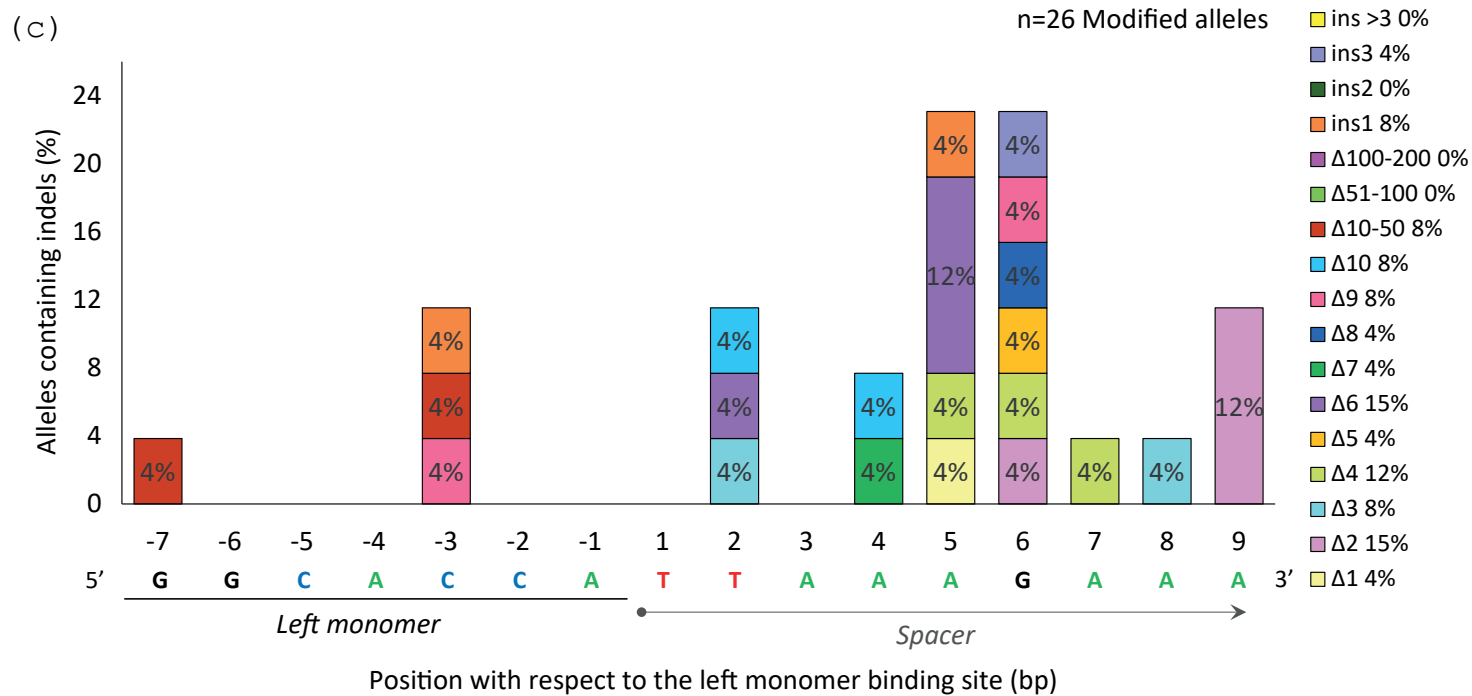

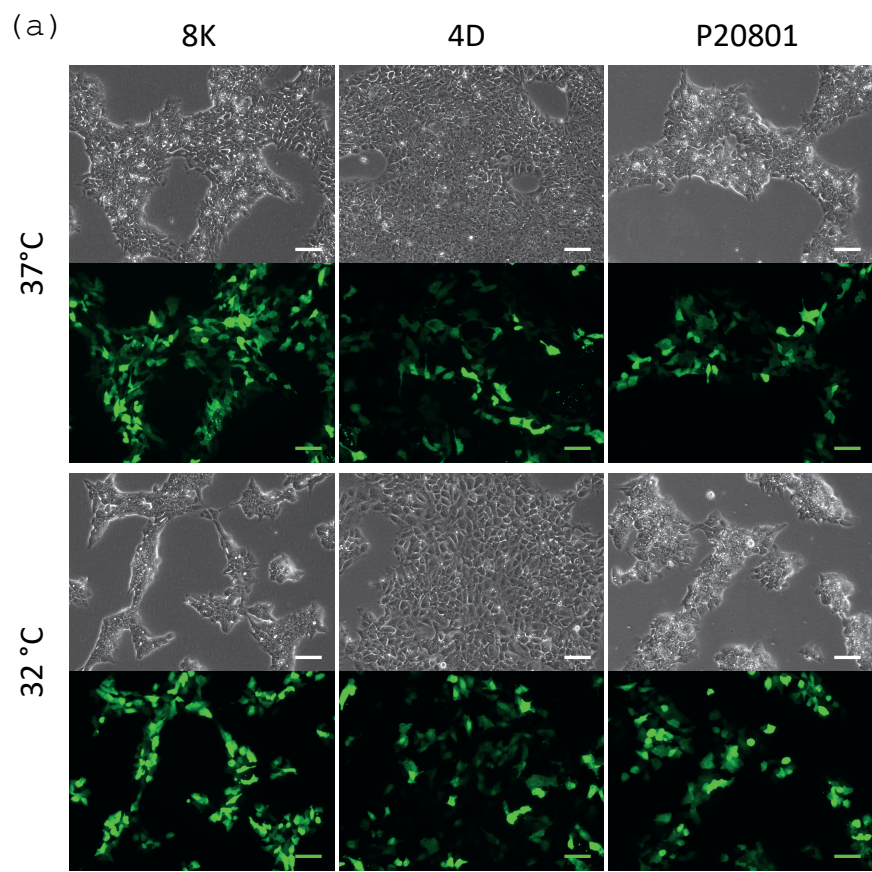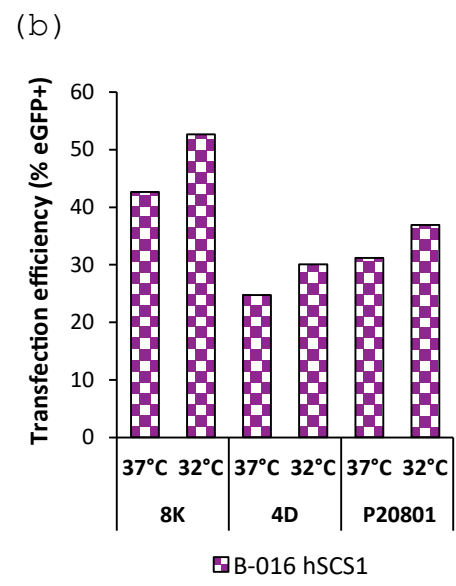

(a)

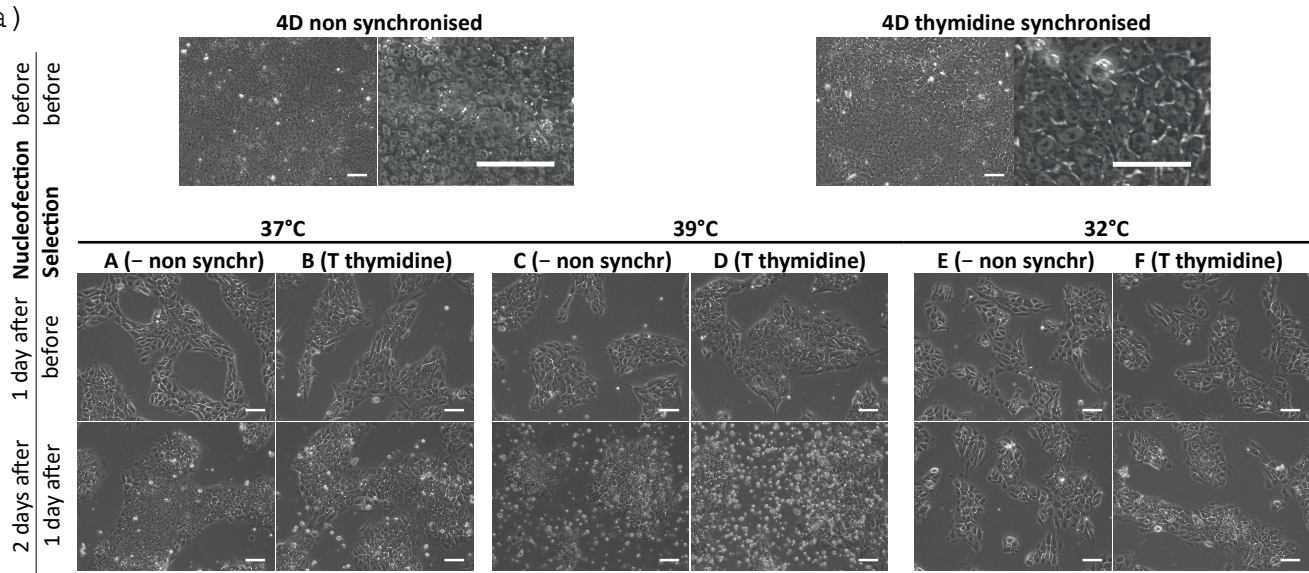

(b)

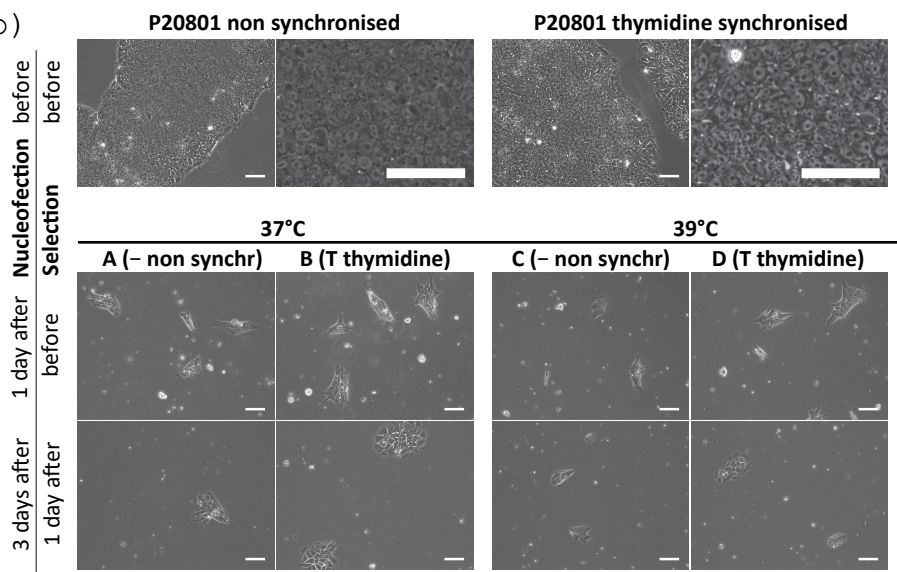

(a)

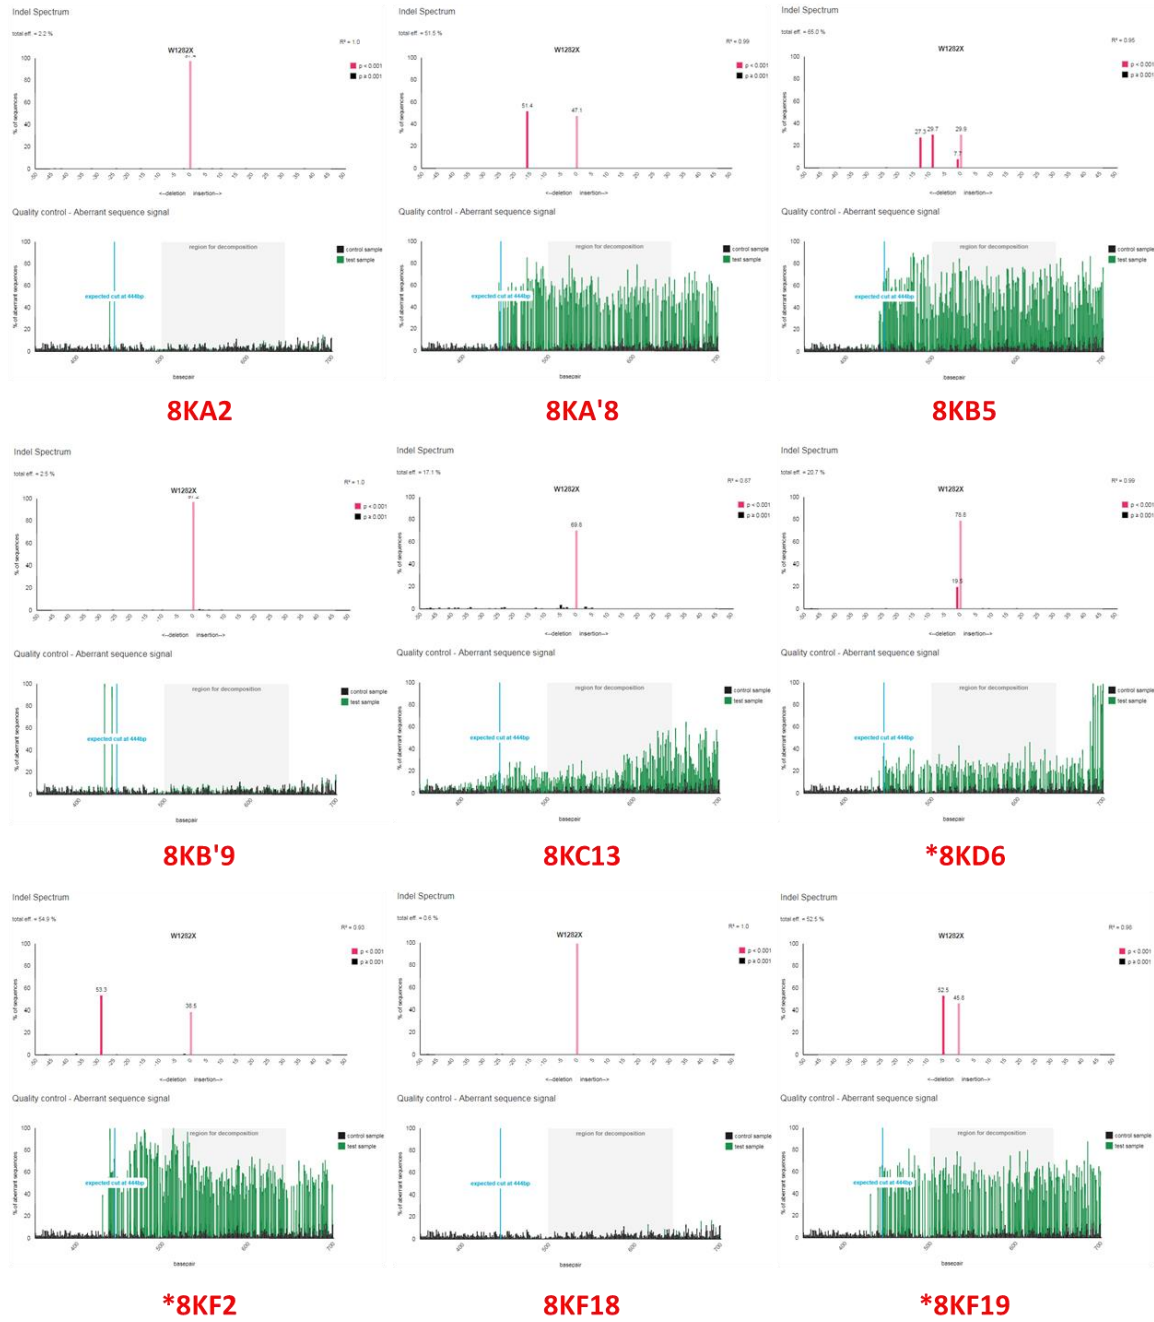

(b)

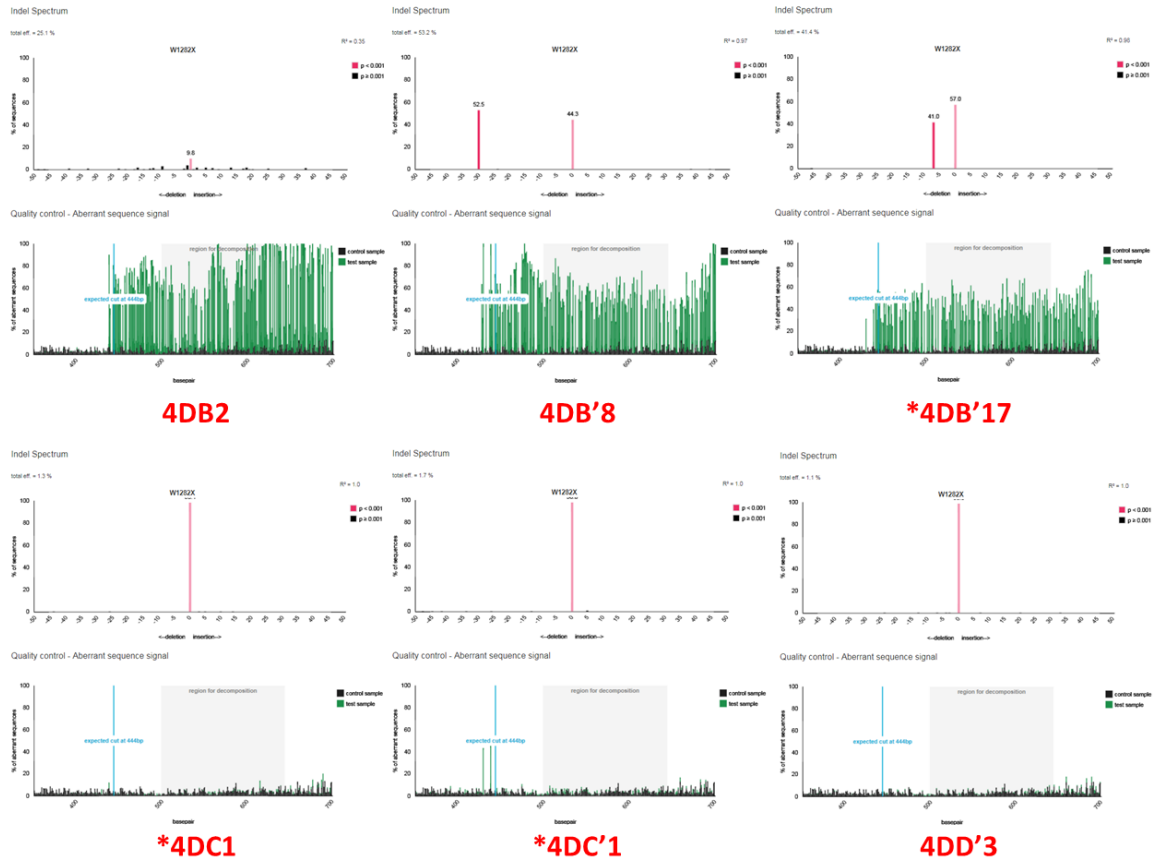

(c)

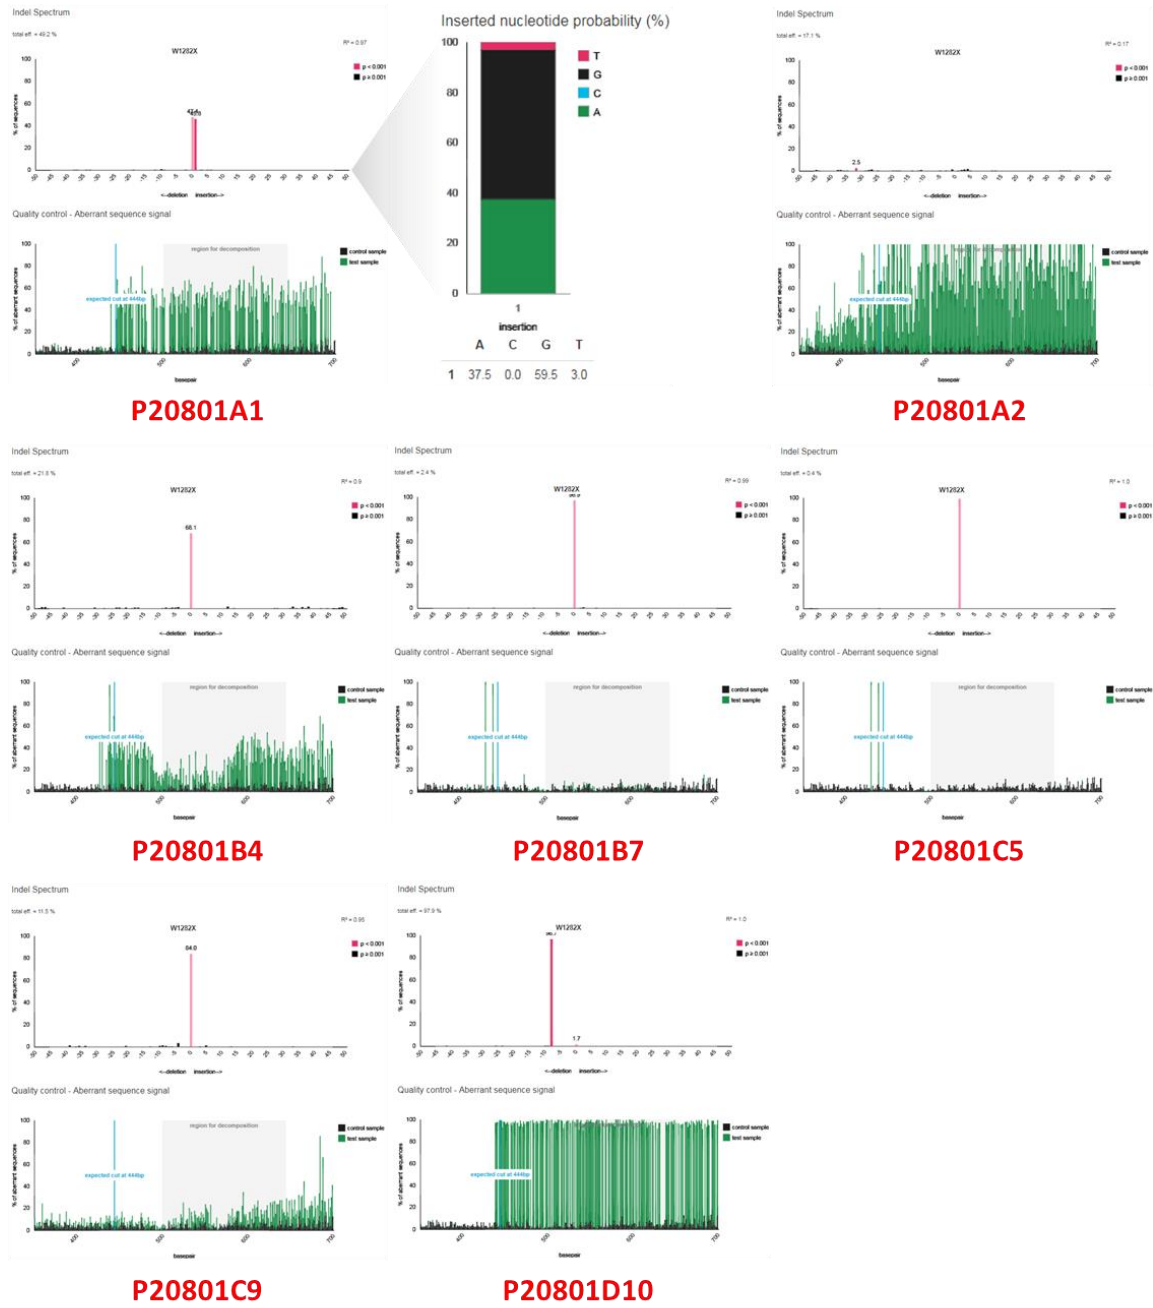

(d)

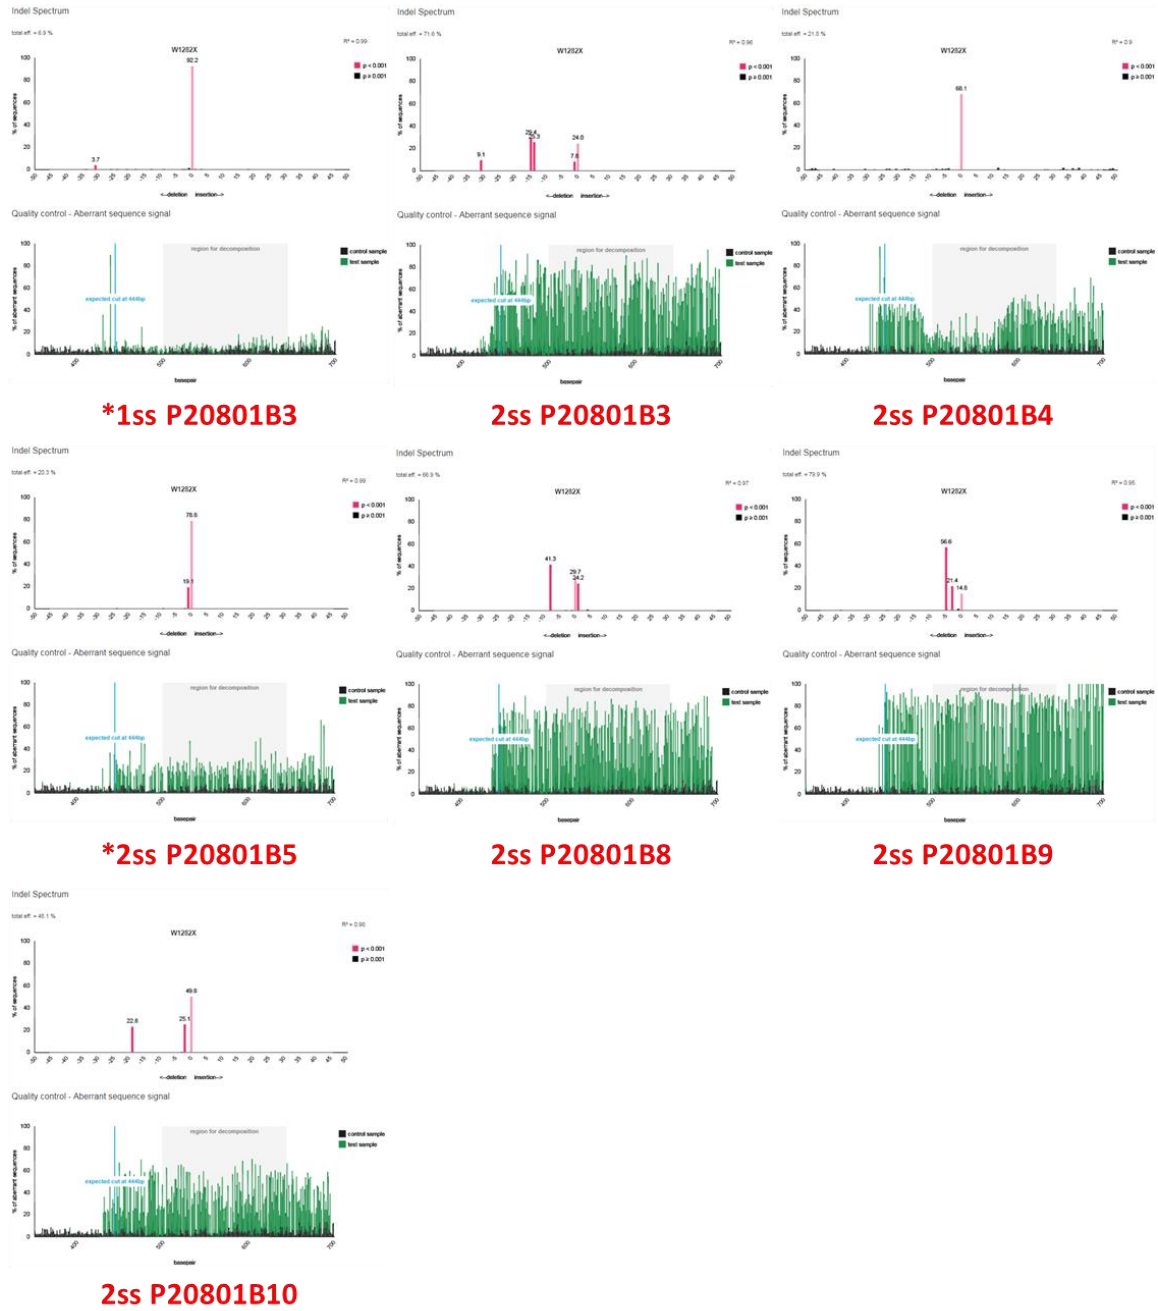

(e)

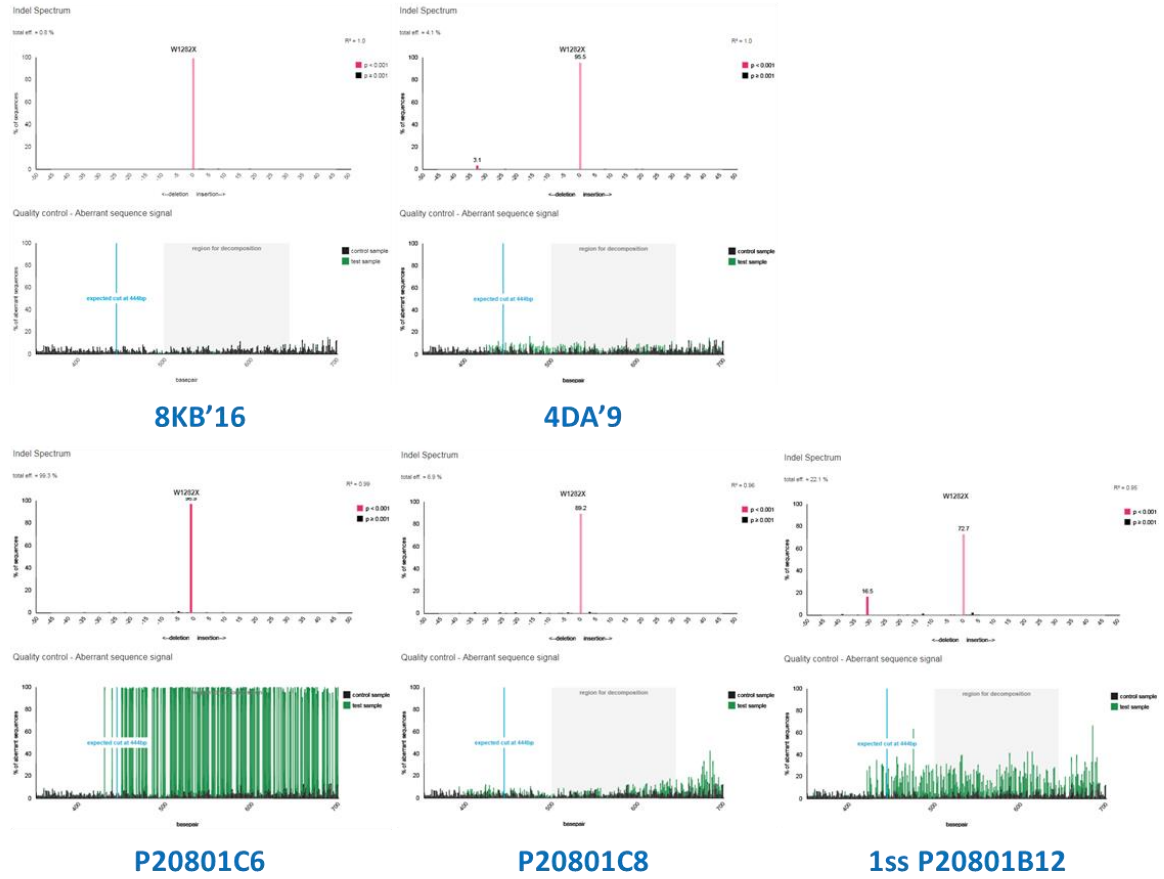

(f)

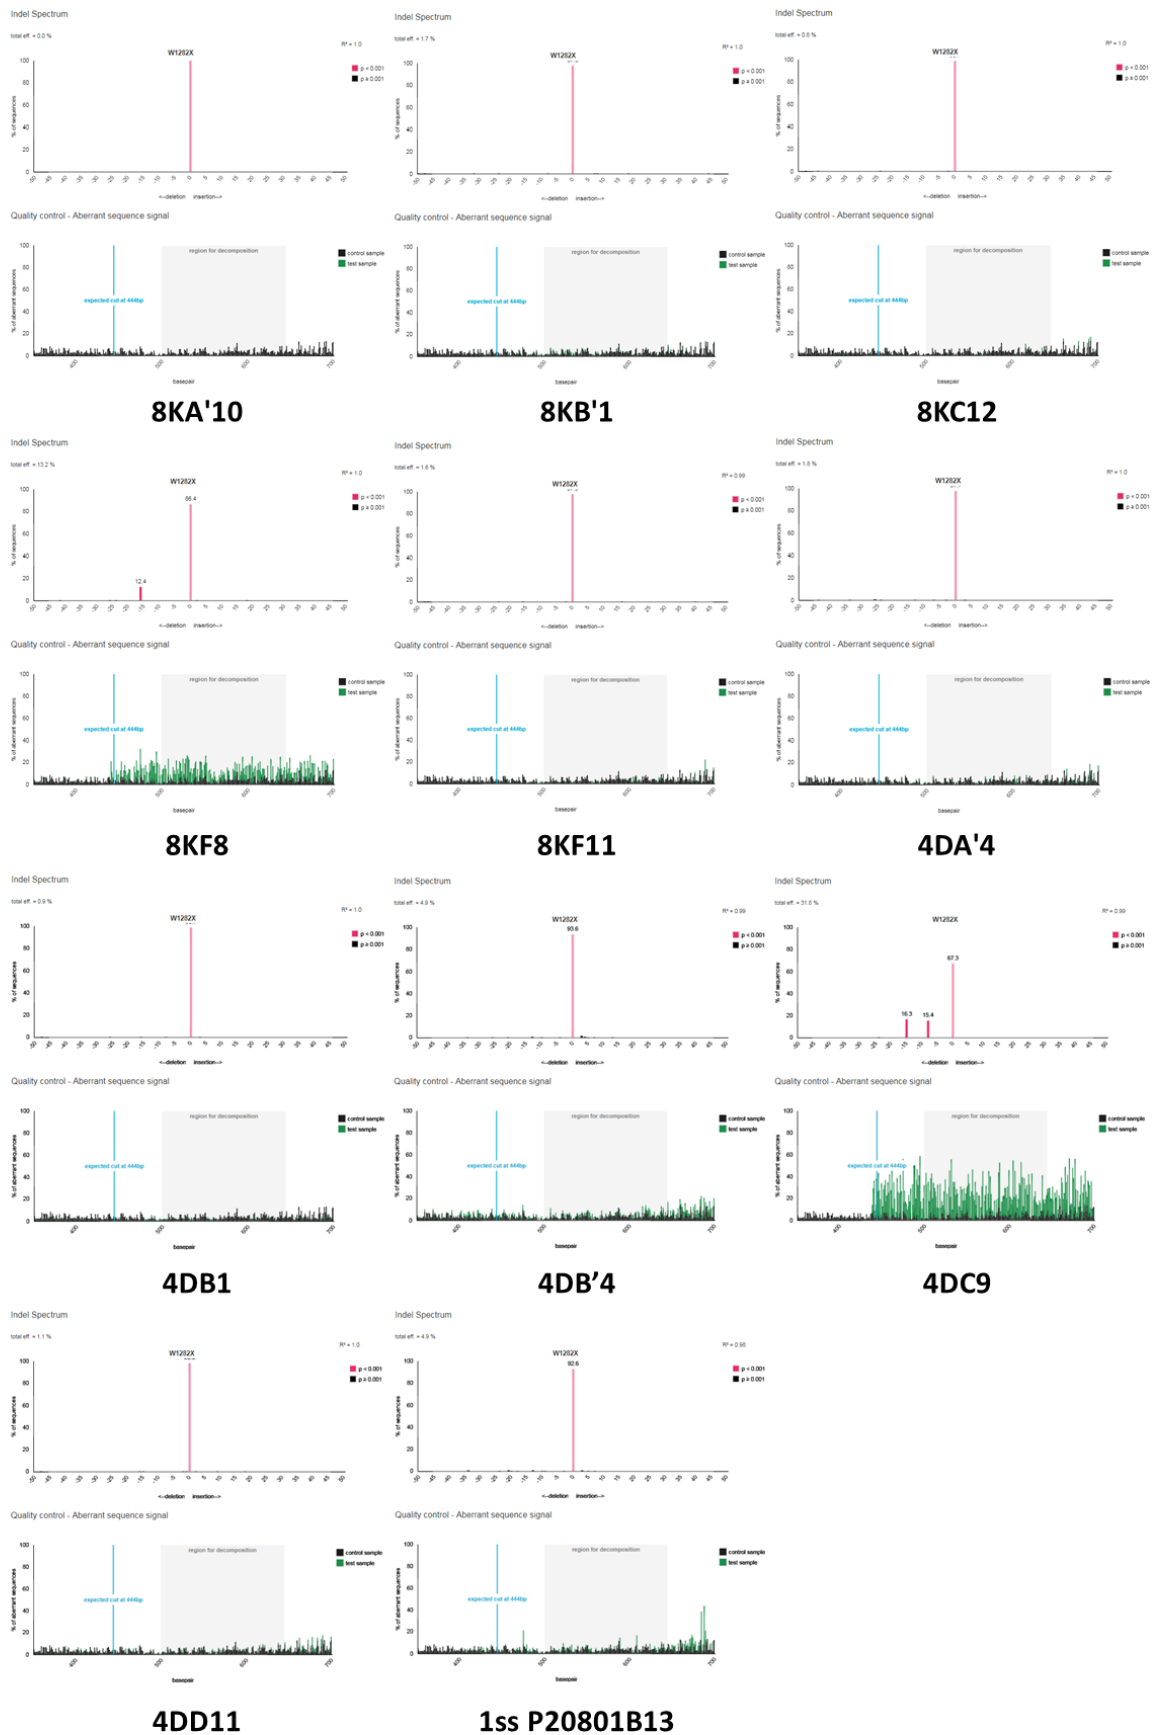

(a) (b)

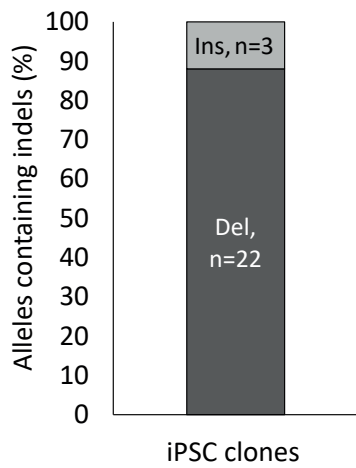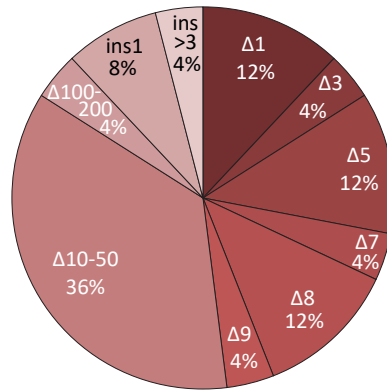

(c)

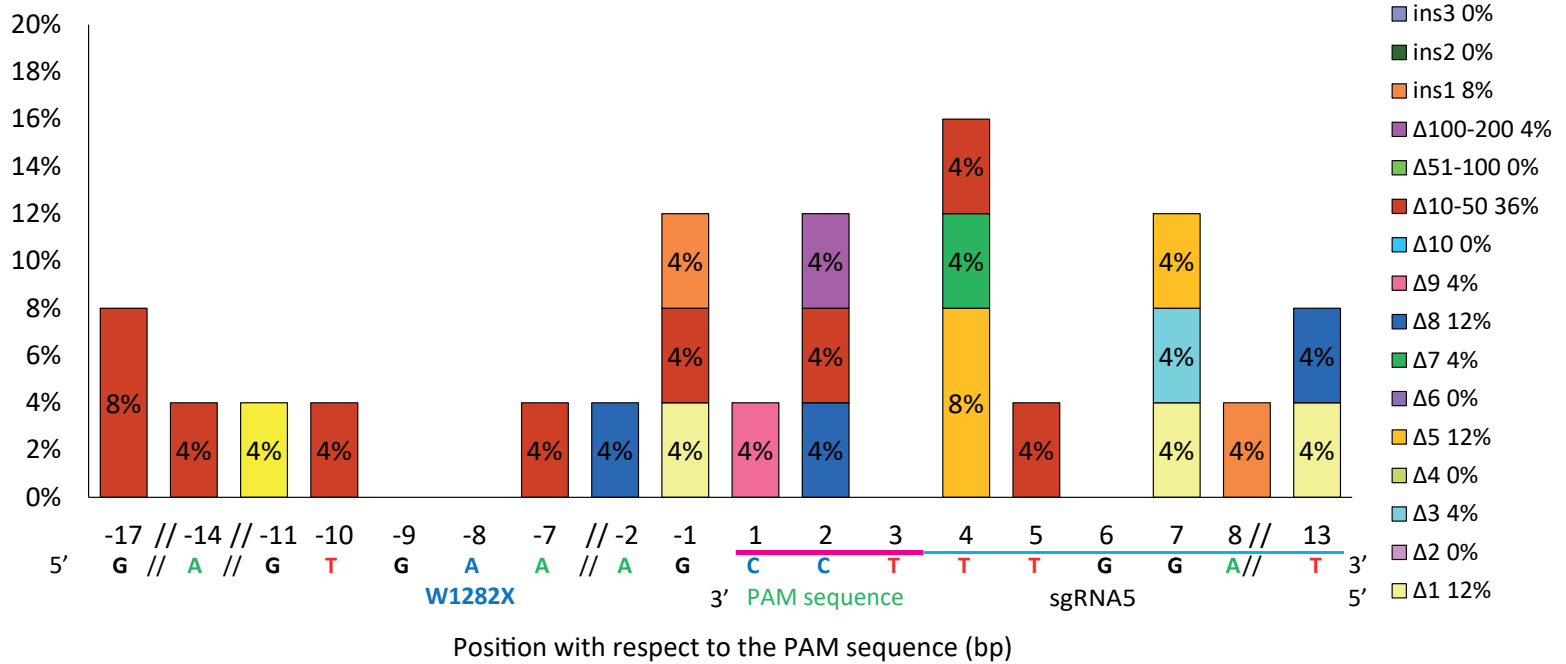

(a)

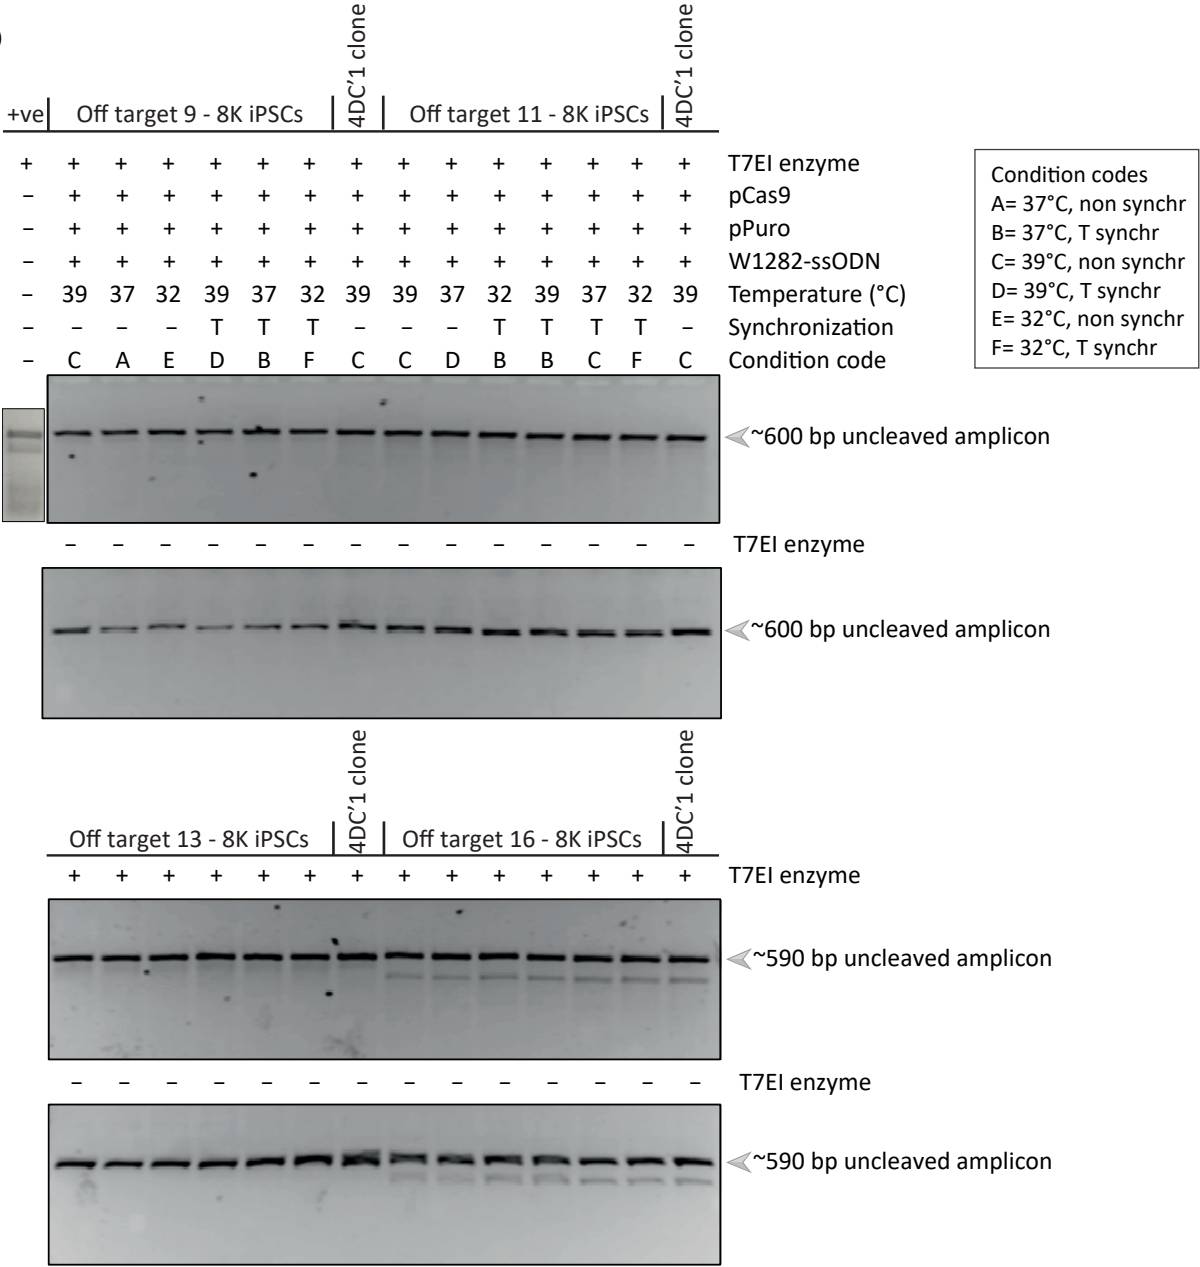

(b)

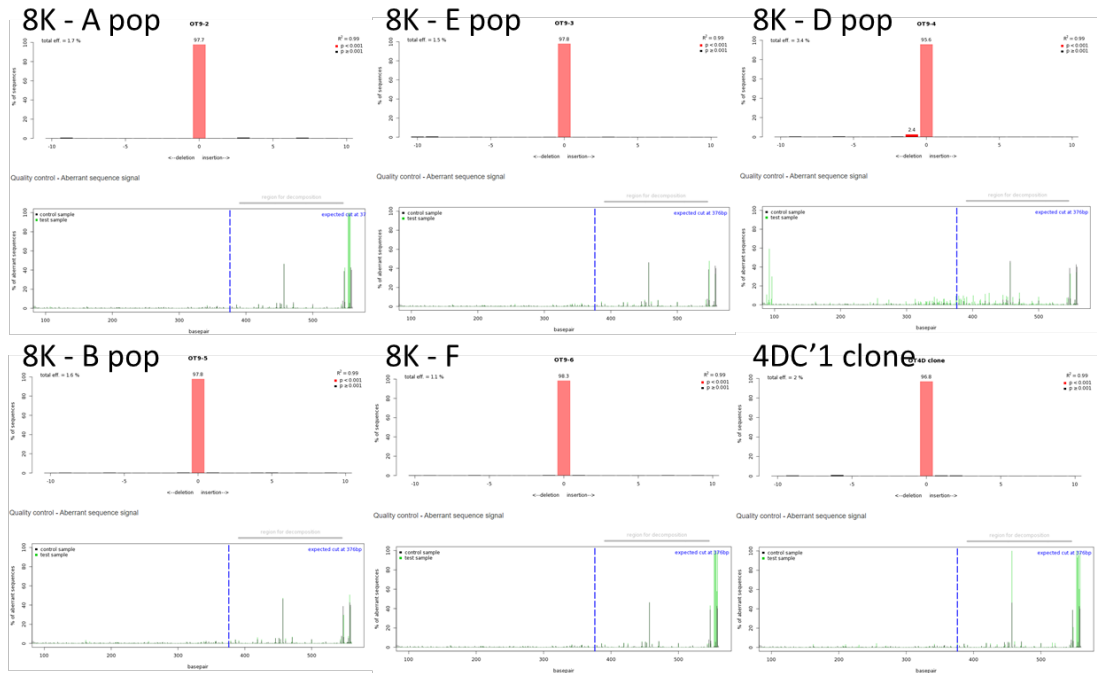

(c)

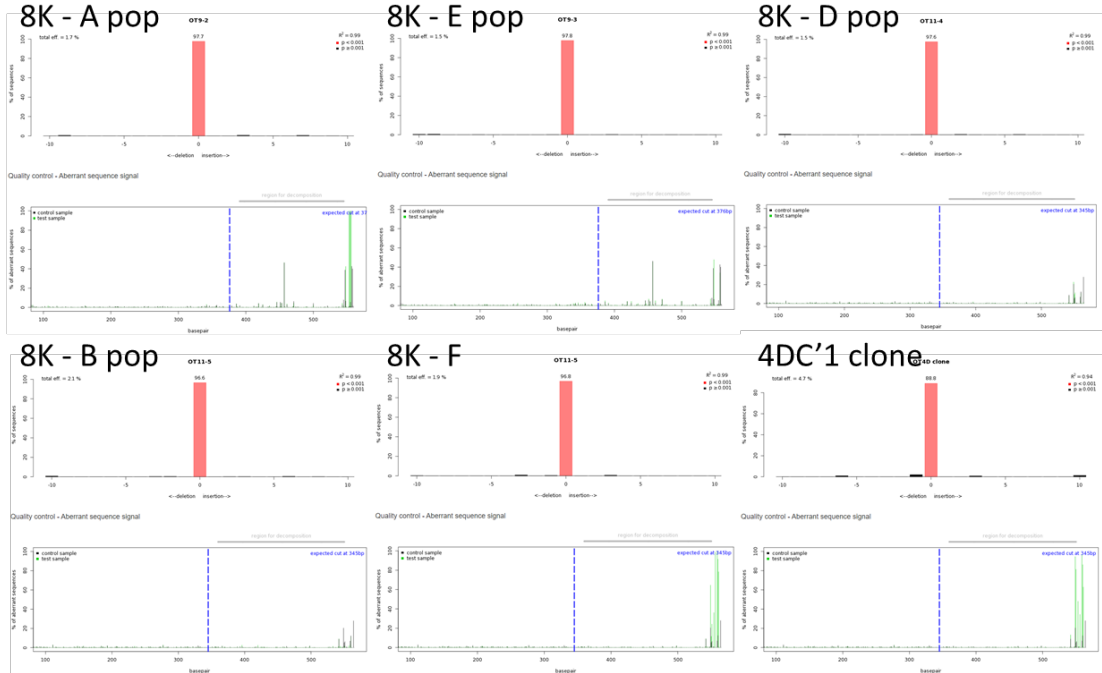

(d)

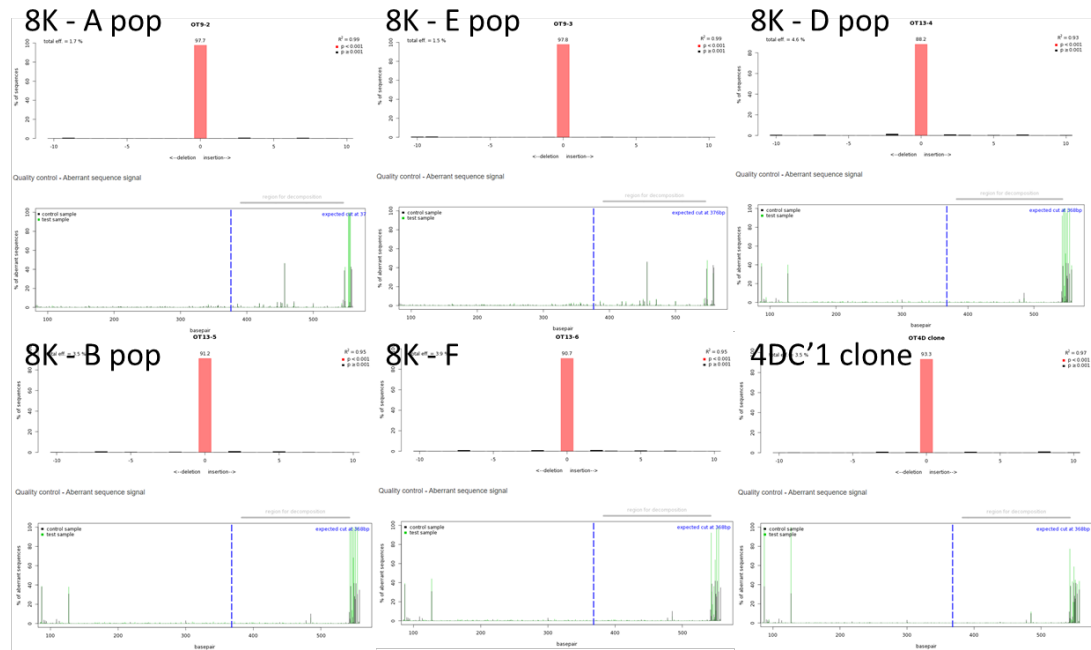

| +ve | P20801 B iPSCs |    |    |    | 1ss P20801 B | P20801 C iPSCs |    |    |    | 2ss P20801 B | 8K'9 clone | 4DC'1 clone |                  |
|-----|----------------|----|----|----|--------------|----------------|----|----|----|--------------|------------|-------------|------------------|
| -   | +              | +  | +  | +  | +            | +              | +  | +  | +  | +            | +          | +           | pCas9            |
| -   | +              | +  | +  | +  | +            | +              | +  | +  | +  | +            | +          | +           | pPuro            |
| -   | +              | +  | +  | +  | +            | +              | +  | +  | +  | +            | +          | +           | W1282-ssODN      |
| -   | 37             | 37 | 39 | 39 | 37           | 37             | 37 | 39 | 39 | 37           | 37         | 39          | Temperature (°C) |
| -   | -              | T  | -  | T  | T            | -              | -  | -  | T  | T            | T          | -           | Synchronization  |
| -   | A              | B  | C  | D  | B            | A              | B  | C  | D  | B            | B          | C           | Condition code   |

Condition codes  
A= 37°C, non synchr  
B= 37°C, T synchr  
C= 39°C, non synchr  
D= 39°C, T synchr

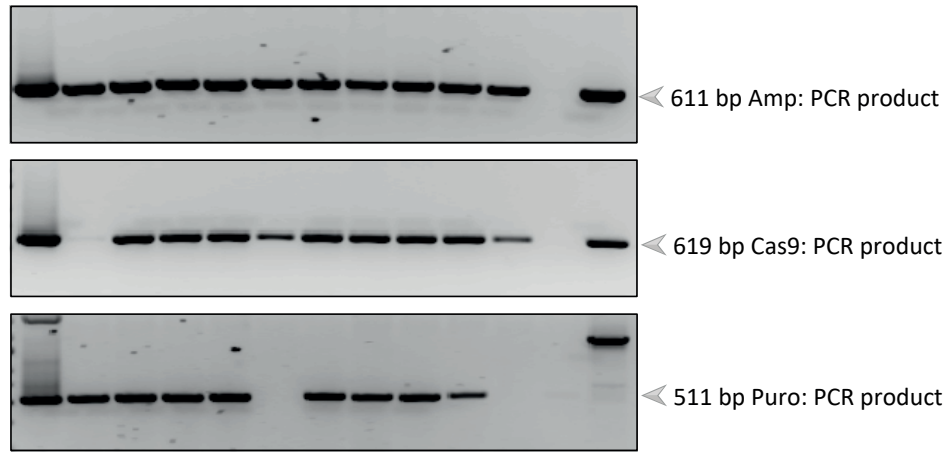

**Figure S1.** Efficient transfection of CA1 cells achieved by nucleofection: (a) Nucleofection was performed in EDTA CA1 cells with 2.5 µg eGFP plasmid, resuspended in Ingenio® electroporation solution, by A-012 (green), A-013 (orange), A-023 (blue), A-027 (yellow) and B-016 (purple) programs. EDTA CA1 nucleofected cultures were assessed, 40 h after transfection, by flow cytometry (dot plots gates were set up at 0.1% threshold based on untransfected cells overlapped in grey, to calculate the transfection efficiency achieved by each program in purple, expressed as percentage); (b) Efficient transfection of CA1 cells upon nucleofection. A-023 and B-016 nucleofection programs were used in combination with the Ingenio® electroporation solution (Ingenio), human Stem Cell solution 1 (hSCS1) or human Stem Cell solution 2 (hSCS2).  $1.45 \times 10^6$  CA1 cells were nucleofected with 2.5 µg eGFP plasmid per reaction. Transfection efficiency was quantified by flow cytometry as previously described in (A) for each set of conditions, 40 hours after nucleofection. Percentage of eGFP positive cells is shown by the bar graph, n=1 per set of conditions; (c) Transfection efficiency of EDTA CA1 and CA1 cells upon nucleofection of eGFP in Ingenio® electroporation solution using the B-016 program. Note that all cells were dissociated into single cells prior to nucleofection, independently of the passaging method. Transfection efficiency was assessed as described in Figure S1a legend. Each data point (n=9, n=15 biological replicates for EDTA and SC CA1 cells, respectively) plotted as circles. The centre lines show the medians; box limits indicate the quartiles; Tukey-whiskers extend 1.5 times the quartiles; crosses represent sample means. A significant difference was found in the transfection efficiency of EDTA CA1 and CA1 cells (nonparametric Mann-Whitney U test).

**Figure S2.** Nucleofected EDTA CA1 and CA1 cultures showed high expression of the pluripotency marker TRA-1-60: (a) The expression of the pluripotency marker TRA-1-60 was assessed by flow cytometry using as controls untransfected-unstained CA1 cells, untransfected-stained CA1 cells, as well as unstained CA1 cells-nucleofected with eGFP (see Figure S1c legend for further details), to set up the flow cytometry gates at 0.1% threshold; (b) Representative transfected EDTA and CA1 cells assessed for TRA-1-60 expression by flow cytometry, 40 hours post-nucleofection incubated under normothermia or hypothermia; (c) TRA-1-60 expression of untransfected CA1 (control), nucleofected EDTA and CA1 cells (incubated under normothermia or hypothermia) is represented as mean  $\pm$  SEM (n=2 biological replicates for control and n=6 for nucleofected samples. No significant difference was found in the expression of TRA-1-60 pluripotency marker (nonparametric Kruskal-Wallis test).

**Figure S3.** The type and location of the indels identified in the CA1 clones: (a) TALEN-induced indels were identified in a total of 26 alleles from the sequenced CA1 clones. Most indels corresponded to deletions (black), although some insertions were also observed (grey); (b) Frequency of each type of deletions and insertions, ranging from 1 to 50 bp, shown as percentages of the 26 alleles containing indels; (c) Distribution of indels was mostly found within the spacer sequence, shown as frequency of each type of modification observed at the indicated positions. Total percentage of each type of modification is displayed on the right of each category.

**Figure S4.** Efficient transfection of 8K, 4D and P20801 iPSCs achieved by nucleofection: (a) Nucleofection of iPSC lines ( $3 \times 10^6$  cells per reaction) was performed with 2.5 µg eGFP plasmid, resuspended in human Stem Cell solution 1 (hSCS1), using B-016 program and incubated at 37°C and 32°C. Cell density and transfection efficiency were qualitatively assessed for each iPSC line and condition by phase-contrast and fluorescence microscopy, 40 hours after nucleofection. Scale bars, 100 µm; (b) Transfection efficiency was then quantified for each condition by flow cytometry, by setting up dot plots gates at 0.1% threshold based on untransfected cells, and eGFP positive cells were expressed as percentage, n=1 per condition.

**Figure S5.** 4D and P20801 nucleofected populations: (a–b) Phase-contrast microscopy images of the non- and S phase synchronised nucleofected (a) 4D and (b) P20801 iPSC populations. Procedure was performed as described in Figure 5a legend;  $3 \times 10^6$  cells were nucleofected with 5 µg pCas9, 2 µg pPuro and 3.5 µl W1282-ssODN, resuspended in medium containing 10 µM Y-27632, and incubated for 2 days at 37°C, 39°C and 32°C. Then, transient puromycin selection was performed for (a) 4D iPSC populations

1 day after nucleofection (0.7  $\mu\text{g/mL}$  for 1 day and 1  $\mu\text{g/mL}$  for 1 day) and (b) for P20801 iPSC populations 2 days after nucleofection (1  $\mu\text{g/mL}$  for 2 days). Scale bars, 100  $\mu\text{m}$ .

**Figure S6.** TIDE analysis of all the chromatograms obtained by Sanger sequencing of the (a) 8K, (b) 4D, (c) P20801, and (d) P20801B frozen/thawed iPSC clones. Additionally, chromatograms obtained from clones that were considered (e) possibly positive and negative (f) were also assessed by TIDE for quality control purposes. Samples indicated with (\*) were re-isolated and subclones were also sequenced and assessed by TIDE analysis (data not shown).

**Figure S7.** The type and location of the indels identified in the iPSC clones: (a) CRISPR-Cas9-mediated DSB induced indels identified in a total of 25 alleles from the 8K, 4D or P20801 iPSC clones. Most indels corresponded to deletions (black), although some insertions were also observed (grey); (b) Frequency of each type of deletions and insertions, ranged from 1 to 200 bp, shown as percentages of the 25 alleles containing indels; (c) Distribution of indels was mostly found around the PAM sequence, shown as frequency of each type of modification observed at the indicated positions. Total percentage of each type of modification is displayed on the right of each category.

**Figure S8.** Off-target analysis of 8K iPSC populations and a representative 4D iPSC clone: (a) T7EI assay analysis of the off-target 9, off-target 11, off-target 13, off-target 16, with and without the addition of T7EI enzyme. A sample confirmed to contain indels was used as control (+ve). TIDE analysis of the Sanger sequencing chromatograms of the amplified PCR product for each 8K iPSC population and 4DC'1 clone compared with 8K C population for (b) off-target 9, (c) 11 and (d) 13.

**Figure S9.** Random plasmid integration analysis of P20801 B, thawed 1ss P20801, P20801 C, thawed 2ss P20801 iPSC populations, representative 8KB'9 and 4DC'1 clones. Plasmids containing an ampicillin resistant cassette, the Cas9 encoding sequence, and a puromycin resistant cassette were used as positive controls (+ve). Amplification of 611 bp, 619 bp and 511 bp PCR products, respectively, suggested a potential plasmid integration or more likely the detection of remaining plasmids in the cells in the case of the iPSC populations.

**Table S1.** Genotyping of 8K, 4D and P20801 iPSC clones. Column 'clone': clones were colour-coded as results from AS-PCR W1282 (expected positive in red, possibly positive in blue, expected negative in bold black). Column 'ss': number of times that the populations, from which clones were isolated, were SC dissociated between nucleofection and clonal isolation; f indicates freezing using GCDR, non ss indicated as (ns). Column 'sequence': only shown the sequences identified at the highest percentages. It was indicated: A, G, or R (when A/G was identified at 50%) at W1282 position (green); PAM site CTT, CTT, or Y (when C/T was identified at 50%) (green); sgRNA binding site (underlined). Deletions (- - -) and insertions (orange) were also indicated. Column 'modified alleles': indicates how many alleles were modified in clones shown pure at the time of analysis; 'not pure' indicated otherwise, '0' was indicated when proportion of modified cells could not be obtained due to impure clones. Column 'modification (visually)': modifications visually identified from the chromatograms. Location of modifications are annotated as 'at x' position downstream (5' → 3') from the PAM site. When several modifications were identified in the same sample, it was indicated as following: modifications in different cells of an impure clone and modifications in a pure clone, but it could not be determined whether they were present in the same or different allele was indicated (/). Modifications contained in the same allele (-) and modifications contained in different alleles (&) of the same pure clone. In cases of impure clones, indicated modifications were deduced from overlapped sequences and/or from sequencing analysis of several re-isolated and analysed subclones. Column 'modification (TIDE)': modifications obtained by TIDE analysis of chromatograms, and their frequencies in the samples indicated as a percentage of the total population. When modifications were not quantified but shown by the quality control graph indicated as 'QC confirmed'. Information was colour-coded based on: whether the results provided by visual analysis were confirmed (green), not detected (red), or new information was provided, not detected previously by visual analysis (blue).

| Clone            | ss | Sequence                                 | Modified alleles | Modification (visually)               | Modification (TIDE)              |
|------------------|----|------------------------------------------|------------------|---------------------------------------|----------------------------------|
| <b>W1282X</b>    |    | TGCAACAGTGAAGGAAAGCCTTTGGAGTGATACCACAGgt |                  | Located modifications                 | Indels present > 2%              |
| <b>8KA2</b>      | 2  | TGCAACAGTGAAGGAAAGCCTTTGGAGTGATACCACAGgt | 1                | het mutPAM                            | QC confirmed                     |
| <b>8KA'8</b>     | 2  | TGCAACAGTGAAGGAAAGCCTT-----gt            | 1                | het del16 at5                         | 51.4% del16                      |
| <b>8KA'10</b>    | 2  | TGCAACAGTGAAGGAAAGCCTTTGGAGTGATACCACAGgt | 0                | -                                     | Control for TIDE                 |
| <b>8KB'1</b>     | 2  | TGCAACAGTGAAGGAAAGCCTTTGGAGTGATACCACAGgt | 0                | -                                     | QC confirmed                     |
| <b>8KB5</b>      | 2  | TGCAACAGTGAAGGAAAG-----TGATACCACAGgt     | not pure         | del9 at1                              | 29.7% del9/27.3% del13/7.7% del1 |
| <b>8KB'9</b>     | 2  | TGCAACAGTGAAGGAAAGCCTTTGGAGTGATACCACAGgt | 2                | hom correct-mutPAM                    | QC confirmed                     |
| <b>8KB'16</b>    | 2  | TGCAACAGTGAAGGAAAGCCTTTGGAGTGATACCACAGgt | 0                | -                                     | QC confirmed                     |
| <b>8KC12</b>     | 2  | TGCAACAGTGAAGGAAAGCCTTTGGAGTGATACCACAGgt | 0                | -                                     | QC confirmed                     |
| <b>8KC13</b>     | 2  | TGCAACAGTGAAGGAAAGCCTTTG-----ATACCACAGgt | not pure         | mutPAM/del5 at7                       | - /3.2% del5                     |
| <b>8KD6</b>      | 2  | TGCAACAGTGAAGGAAAGCCTTTG-AGTGATACCACAGgt | not pure         | het correct/mutPAM/del1 at7           | QC confirmed/19.5% del1          |
| <b>8KF2</b>      | 2  | TGCAACAGTGRAGGAAA-----                   | 2                | het correct-mutPAM & del29 at-1       | QC confirmed/53.3% del29         |
| <b>8KF8</b>      | 2  | TGCAACAGTGAAGGAAAGCCT-----Ggt            | not pure         | del16 at4                             | 12.4% del16                      |
| <b>8KF11</b>     | 2  | TGCAACAGTGAAGGAAAGCCTTTGGAGTGATACCACAGgt | 0                | -                                     | QC confirmed                     |
| <b>8KF18</b>     | 2  | TGCAACAGTGAAGGAAAGCCTTTGGAGTGATACCACAGgt | 0                | -                                     | QC confirmed                     |
| <b>8KF19</b>     | 2  | TGCAACAGTGRAGGAAAGCCT-----GTGATACCACAGgt | 1 or 2           | het correct/mutPAM/del5 at4           | QC confirmed/52.5% del5          |
| <b>4DA'4</b>     | 2  | TGCAACAGTGAAGGAAAGCCTTTGGAGTGATACCACAGgt | 0                | -                                     | QC confirmed                     |
| <b>4DA'9</b>     | 2  | TGCA-----Ggt                             | not pure         | del33 at-14                           | 3.1% del33                       |
| <b>4DB1</b>      | 2  | TGCAACAGTGAAGGAAAGCCTTTGGAGTGATACCACAGgt | 0                | -                                     | QC confirmed                     |
| <b>4DB2</b>      | 2  | TGCAACAGTGAAGGAAAGC-----                 | 2                | het mutPAM & del154 at2               | - /QC indicates a change         |
| <b>4DB'4</b>     | 2  | TGCAACAGTGAAGGAAAGCCTTTGGAGTGATACCACAGgt | 0                | -                                     | QC confirmed                     |
| <b>4DB'8</b>     | 2  | TGCAACAG-----gt                          | 2                | het correct-mutPAM & del30 at-10      | - /52.5% del30                   |
| <b>4DB'17</b>    | 2  | TGCAACAGTGRAGGAAAGCCT-----GATACCACAGgt   | 1 or 2           | het correct/mutPAM/del7 at4           | QC confirmed/41% del7            |
| <b>4DC1</b>      | 2  | TGCAACAGTGAAGGAAAGCCTTTGGAGTGATACCACAGgt | not pure         | correct/mutPAM                        | QC confirmed                     |
| <b>4DC'1</b>     | 2  | TGCAACAGTGRAGGAAAGCCTTTGGAGTGATACCACAGgt | 1 or 2           | het correct/mutPAM                    | QC confirmed                     |
| <b>4DC9</b>      | 2  | TGCAACAGTGAAGGAAAGC-----t                | not pure         | del15 at2/del8 at13                   | 16.3% del15/15.4% del8           |
| <b>4DD'3</b>     | 2  | TGCAACAGTGAAGGAAAGCCTTTGGAGTGATACCACAGgt | 0                | -                                     | QC confirmed                     |
| <b>4DD11</b>     | 2  | TGCAACAGTGAAGGAAAGCCTTTGGAGTGATACCACAGgt | 0                | -                                     | QC confirmed                     |
| <b>P20801A1</b>  | ns | TGCAACAGTGAAGGAAAGCCTTTGGAGTGATACCACAGgt | 1 or 2           | het mutPAM/ins1 at8                   | QC confirmed/45.8% ins1(59.5%G)  |
| <b>P20801A2</b>  | ns | TGCAACAGTGAAGGAAAGCCTTTGGAGTGATACCACAGgt | not pure         | correct/mutPAM                        | - /2.5% del32                    |
| <b>P20801B4</b>  | ns | TGCAACAGTGAAGGAAAGCCTTTGGAGTGATACCACAGgt | 2                | hom correct-mutPAM & ins55-4=51 at-11 | - /QC indicates a change         |
| <b>P20801B7</b>  | ns | TGCAACAGTGAAGGAAAGCCTTTGGAGTGATACCACAGgt | 2                | hom correct-mutPAM                    | QC confirmed                     |
| <b>P20801C5</b>  | 1  | TGCAACAGTGAAGGAAAGCCTTTGGAGTGATACCACAGgt | 2                | hom correct-mutPAM                    | QC confirmed                     |
| <b>P20801C6</b>  | 1  | TGCAACAGTGAAGGAAAGCCTTTGGAGTGA-ACCACAGgt | 2                | hom correct-mutPAM-del1 at13          | QC confirmed/96.9% del1          |
| <b>P20801C8</b>  | 1  | TGCAACAGTGAAGGAAAGCCTTTGGAGTGATACCACAGgt | 0                | -                                     | QC confirmed                     |
| <b>P20801C9</b>  | 1  | TGCAACAGTGAAGGAAAGCCTTTGGAGTGATACCACAGgt | not pure         | -                                     | 3.1% del4                        |
| <b>P20801D10</b> | 1  | TGCAACAGTGAAGGAAAGC-----TGATACCACAGgt    | 2                | hom del8 at2                          | 96.7% del8                       |

|                          |     |                                          |          |                               |                                                |
|--------------------------|-----|------------------------------------------|----------|-------------------------------|------------------------------------------------|
| <b>1ss P20801B3</b>      | f   | TGCAACAGTGRAGGAAAGCTTTTGGAGTGATACCACAGgt | not pure | het correct-hom<br>mutPAM     | QC confirmed/3.7%<br>del31                     |
| <b>1ss<br/>P20801B12</b> | f   | T-----CCACAGgt                           | not pure | del31 at-17                   | 16.5% del31                                    |
| <b>1ss<br/>P20801B13</b> | f   | TGCAACAGTGAAGGAAAGCCTTTGGAGTGATACCACAGgt | 0        | -                             | QC confirmed                                   |
| <b>2ss P20801B3</b>      | 1,f | T-----CCACAGgt                           | not pure | del31 at-17                   | 29.4%del15/25.3%del14/<br>9.1% del31/7.8% del1 |
| <b>2ss P20801B4</b>      | 1,f | TGCAACAGTGRAGGAAAGCTTTTGGAGTGATACCACAGgt | not pure | hom correct-mutPAM            | - /QC indicates a change                       |
| <b>2ss P20801B5</b>      | 1,f | TGCAACAGTGAAGGAAAGCYTTTG-AGTGATACCACAGgt | not pure | hom correct-mutPAM            | QC confirmed/19.1%<br>del1                     |
| <b>2ss P20801B8</b>      | 1,f | TGCAACAGTGAAGGAA-----GAGTGATACCACAGgt    | not pure | del8 at-2                     | 41.3% del8/24.2% ins1                          |
| <b>2ss P20801B9</b>      | 1,f | TGCAACAGTGAAGGAAARCCT-----TGATACCACAGgt  | not pure | G>A at-1/del5 at4/del3<br>at7 | - /56.6% del5/21.4% del3                       |
| <b>2ss<br/>P20801B10</b> | 1,f | TGCAACAGTGA-----TACCACAGgt               | not pure | del19 at-7                    | 25.1% del2/22.8% del19                         |

**Table S2.** Summary of the number of predicted potential off-targets obtained by Cas-OFFinder (<http://www.rgenome.net/>).

| Target Sequence         | Bulge Type | Mismatch | Bulge Size | Number of Found Targets | <i>In vitro</i> tests performed |
|-------------------------|------------|----------|------------|-------------------------|---------------------------------|
| CACCTGTGGTATCACTCCAANGG | DNA        | 1        | 1          | 1                       | See below                       |
| CACCTGTGGTATCACTCCAANGG | DNA        | 2        | 1          | 8                       | See below                       |
| CACCTGTGGTATCACTCCAANGG | DNA        | 3        | 1          | 247                     |                                 |
| CACCTGTGGTATCACTCCAANGG | DNA        | 4        | 1          | 3549                    |                                 |
| CACCTGTGGTATCACTCCAANGG | DNA        | 0        | 2          | 1                       | See below                       |
| CACCTGTGGTATCACTCCAANGG | DNA        | 1        | 2          | 2                       | See below                       |
| CACCTGTGGTATCACTCCAANGG | DNA        | 2        | 2          | 2                       | See below                       |
| CACCTGTGGTATCACTCCAANGG | DNA        | 3        | 2          | 96                      |                                 |
| CACCTGTGGTATCACTCCAANGG | DNA        | 4        | 2          | 1650                    |                                 |

**Table S3.** Details of the top predicted potential off-targets obtained by Cas-OFFinder.

| Off-target | Bulge Type | Target                                                                                                 | Chromosome | Position  | Direction | Mismatches | Bulge Size | <i>In vitro</i> tests performed |
|------------|------------|--------------------------------------------------------------------------------------------------------|------------|-----------|-----------|------------|------------|---------------------------------|
| 0          | X          | crRNA: CACCTGTGGTATCACTCCAANGG<br>DNA: CACCTGTGGTATCACTCCAAAGG                                         | chr7       | 117642573 | -         | 0          | 0          | on target                       |
| 1          | DN A       | crRNA: C-ACCTGTGGTATCACTCCAANGG<br>DNA: tCACCTGTGGTATCACTCCAAAGG                                       | chr7       | 117642573 | -         | 1          | 1          | Not possible                    |
| 2          | DN A       | crRNA: C--ACCTGTGGTATCACTCCAANGG<br>DNA: CTCACCTGTGGTATCACTCCAAAGG                                     | chr7       | 117642573 | -         | 0          | 2          | Not possible                    |
| 5          | DN A       | crRNA: CA--CCTGTGGTATCACTCCAANGG<br>DNA: CtCACCTGTGGTATCACTCCAAAGG                                     | chr7       | 117642573 | -         | 1          | 2          | Not possible                    |
| 6          | DN A       | crRNA: CAC--CTGTGGTATCACTCCAANGG<br>DNA: CtCACCTGTGGTATCACTCCAAAGG                                     | chr7       | 117642573 | -         | 1          | 2          | Not possible                    |
| 7          | DN A       | crRNA: CA-CCTGTGGTATCACTCCAANGG<br>DNA: tcACCTGTGGTATCACTCCAAAGG                                       | chr7       | 117642573 | -         | 2          | 1          | Not possible                    |
| 8          | DN A       | crRNA: CACC--TGTGGTATCACTCCAANGG<br>DNA: CtCaCCTGTGGTATCACTCCAAAGG                                     | chr7       | 117642573 | -         | 2          | 2          | Not possible                    |
| 9          | DN A       | crRNA: CACCTGTGGTATCA-CTCCAANGG<br>DNA: CACCTGTGGctTCACCTCCAAGGG<br>TIDEanalysis: CACCTGTGGctTCACCTCCA | chr2       | 241721184 | -         | 2          | 1          | T7, Sanger seq                  |
| 10         | DN A       | crRNA: CACCTGTGGTATCAC-TCCAANGG<br>DNA: CACCTGTGGctTCACCTCCAAGGG                                       | chr2       | 241721184 | -         | 2          | 1          | same as OT9                     |
| 11         | DN A       | crRNA: CACCTGTGGTA-TCACTCCAANGG<br>DNA: CACgTGTGGTATTCAaTCCAACGG<br>TIDEanalysis: CACgTGTGGTATTCAaTCCA | chr1<br>6  | 66081948  | -         | 2          | 1          | T7, Sanger seq                  |
| 12         | DN A       | crRNA: CACCTGTGGTATCACTCCAANGG<br>DNA: CACgTGTGGTATTCAaTCCAACGG                                        | chr1<br>6  | 66081948  | -         | 2          | 1          | same as OT11                    |
| 13         | DN A       | crRNA: CACCTGTGGTATC-ACTCCAANGG<br>DNA: CACCTGTGGTATCAaATCCAgAGG<br>TIDEanalysis: CACCTGTGGTATCAaATCCA | chr3       | 64367349  | +         | 2          | 1          | T7, Sanger seq                  |
| 14         | DN A       | crRNA: CACCTGTGGTATCA-CTCCAANGG<br>DNA: CACCTGTGGTATCAaATCCAgAGG                                       | chr3       | 64367349  | +         | 2          | 1          | same as OT13                    |
| 15         | DN A       | crRNA: CACCTGTGGTATCAC-TCCAANGG<br>DNA: CACCTGTGGTATCAaATCCAgAGG                                       | chr3       | 64367349  | +         | 2          | 1          | same as OT13                    |
| 16         | DN A       | crRNA: CACCTGT--GGTATCACTCCAANGG<br>DNA: CACgTGTTCGGTATCACTgCAATGG                                     | chr2       | 11778003  | -         | 2          | 2          | T7                              |

Not possible: the first eight identified off-targets in chromosome 7 are located within a few nucleotides of the on-target side, therefore, targeting of these sites would result in almost identical outcomes as compared with on-target activity, likely leading to the same desired effects as the on-target activity, thus, the *in vitro* assessment of these off-targets was not possible.

**Table S4.** Results of the Sanger sequencing analysis of the selected predicted CRISPR-Cas9 off-targets.

| Off-target | Sample      | Sequence                                                                                   | Modification                                                                    |
|------------|-------------|--------------------------------------------------------------------------------------------|---------------------------------------------------------------------------------|
| 9          | 8K pop-C    | TGAGAGGCCAGTGAGgCCTgCACGGTGGCCTCAGCTTC                                                     | -                                                                               |
|            | 8K pop-A    | TGAGAGGCCAGTGAGgCCTgCACGGTGGCCTCAGCTTC                                                     | -                                                                               |
|            | 8K pop-E    | TGAGAGGCCAGTGAGgCCTgCACGGTGGCCTCAGCTTC                                                     | -                                                                               |
|            | 8K pop-D    | TGAGAGGCCAGTGAG <sup>g</sup> <sub>a</sub> CCT <sup>g</sup> <sub>a</sub> CACGGTGGCCTCAGCTTC | heterozygous<br>1bp substitutions<br>at 95, 99 G<A<br>G<A (2.4%)                |
|            | 8K pop-B    | TGAGAGGCCAGTGAGgCCTgCACGGTGGCCTCAGCTTC                                                     | -                                                                               |
|            | 8K pop-F    | TGAGAGGCCAGTGAGgCCTgCACGGTGGCCTCAGCTTC                                                     | -                                                                               |
|            | 4DC'1 clone | TGAGAGGCCAGTGAGgCCTgCACGGTGGCCTCAGCTTC                                                     | SNP detected: TC<br>heterozygous at<br>458 8K, CC<br>homozygous 4D<br>iPSC line |
| 11         | 8K pop-C    | TGTAGAGTAAACCATTTTTA <sup>t</sup> TGGTGTGAGAGGAGTGGT                                       | -                                                                               |
|            | 8K pop-A    | TGTAGAGTAAACCATTTTTA <sup>t</sup> TGGTGTGAGAGGAGTGGT                                       | -                                                                               |
|            | 8K pop-E    | TGTAGAGTAAACCATTTTTA <sup>t</sup> TGGTGTGAGAGGAGTGGT                                       | -                                                                               |
|            | 8K pop-D    | TGTAGAGTAAACCATTTTTA <sup>t</sup> TGGTGTGAGAGGAGTGGT                                       | -                                                                               |
|            | 8K pop-B    | TGTAGAGTAAACCATTTTTA <sup>t</sup> TGGTGTGAGAGGAGTGGT                                       | -                                                                               |
|            | 8K pop-F    | TGTAGAGTAAACCATTTTTA <sup>t</sup> TGGTGTGAGAGGAGTGGT                                       | -                                                                               |
|            | 4DC'1 clone | TGTAGAGTAAACCATTTTTA <sup>t</sup> <sub>c</sub> TGGTGTGAGAGGAGTGGT                          | SNP detected: TT<br>homozygous at<br>79 8K, TC<br>heterozygous 4D<br>iPSC line  |
| 13         | 8K pop-C    | AATTTTAGATGGAGTTTTAG <sup>a</sup> <sub>g</sub> GGTGTACTCCTGTAAGCTT                         | -                                                                               |
|            | 8K pop-A    | AATTTTAGATGGAGTTTTAG <sup>a</sup> <sub>g</sub> GGTGTACTCCTGTAAGCTT                         | -                                                                               |
|            | 8K pop-E    | AATTTTAGATGGAGTTTTAG <sup>a</sup> <sub>g</sub> GGTGTACTCCTGTAAGCTT                         | -                                                                               |
|            | 8K pop-D    | AATTTTAGATGGAGTTTTAG <sup>a</sup> <sub>g</sub> GGTGTACTCCTGTAAGCTT                         | -                                                                               |
|            | 8K pop-B    | AATTTTAGATGGAGTTTTAG <sup>a</sup> <sub>g</sub> GGTGTACTCCTGTAAGCTT                         | -                                                                               |
|            | 8K pop-F    | AATTTTAGATGGAGTTTTAG <sup>a</sup> <sub>g</sub> GGTGTACTCCTGTAAGCTT                         | -                                                                               |
|            | 4DC'1 clone | AATTTTAGATGGAGTTTTAG <sup>g</sup> GGTGTACTCCTGTAAGCTT                                      | SNP detected:<br>AG heterozygous<br>at 87 8K, GG<br>homozygous 4D<br>iPSC line  |

|    |             |                                           |                             |
|----|-------------|-------------------------------------------|-----------------------------|
| 16 | 8K pop-C    | ACATGGACGTGTGGGGGCCCCACGTGCCTTCTTATAGGAC  |                             |
|    | 8K pop-A    | ACATGGACGTGTGGGGGCCCCACGTGCCTTCTTATAGGAC  |                             |
|    | 8K pop-E    | ACATGGACGTGTGGGGGCCCCACGTGCCTTCTTATAGGAC  |                             |
|    | 8K pop-D    | ACATGGACGTGTGGGGGCCCCACGTGCCTTCTTATAGGAC  |                             |
|    | 8K pop-B    | ACATGGACGTGTGGGGGCCCCACGTGCCTTCTTATAGGAC  |                             |
|    | 8K pop-F    | ACATGGACGTGTGGGGGCCCCACGTGCCTTCTTATAGGAC  |                             |
|    | 4DC'1 clone | ACATGGACGTGTGGGGGCCCCcACGTGCCTTCTTATAGGAC | Insertion 1bp (c)<br>at 532 |

**Table S5.** Primer list for PCR reactions and sequencing analysis. Note that primers in uppercase bind to exon regions, while lowercase primers bind to intron regions, and primers indicated as ‘repeat’ were used for several programs.

| PCR name            | Primer name | Primer sequence 5' → 3'     |
|---------------------|-------------|-----------------------------|
| Ex11newT7 PCR       | Fw_newT7    | TGATTATGGGAGAACTGGAGC       |
| Ex11newT7 PCR       | Rev_CFTR11  | ccattcacagtagcttacc         |
| Ex11newT7 Phire-PCR | Fw_newT7    | repeat                      |
| Ex11newT7 Phire-PCR | Rev_CFTR11  | repeat                      |
| ASPCR Nor           | Fw_Nor      | GGCACCATTAAAGAAAATATCATCTT  |
| ASPCR Nor           | Rev_Nor     | caatgctcattccattaggctata    |
| ASPCR ΔF508         | Fw_CTT      | GGCACCATTAAAGAAAATATCATTGG  |
| ASPCR ΔF508         | Rev_CTT     | gatcaatgctcattccattaggctata |
| Ex23CFTR HiFi-PCR   | Fw_CFTR23   | Gtgcataagacactcttgc         |
| Ex23CFTR HiFi-PCR   | Rev_CFTR23  | Aactggaggtcaggccact         |
| Ex23CFTR PCR        | Fw_CFTR23   | repeat                      |
| Ex23CFTR PCR        | Rev_CFTR23  | repeat                      |
| ASPCR W1282         | Fw_W1282    | TGCAACAGTGGAGGAAAGCT        |
| ASPCR W1282         | Rev_CFTR23  | repeat                      |
| Off-target 9        | Fw_OT9      | GGGTCACCCTGGCCT             |
| Off-target 9        | Rev_OT9     | GACAGGGGTTTCTCTTTAGAGC      |
| Off-target 11       | Fw_OT11     | TTCATCAAGTCACTTGGTGGG       |
| Off-target 11       | Rev_OT11    | GTGGGAAGGATTCAGGTGTG        |
| Off-target 13       | Fw_OT13     | TCTGGCTGTAACAAACAGGTAC      |
| Off-target 13       | Rev_OT13    | TCCATGTAAGCATCAGGTGC        |
| Off-target 16       | Fw_OT16     | CGGGCATAGGCAGTTGG           |
| Off-target 16       | Rev_OT16    | TGCCCTTTAGGGAGCAGT          |
| Amp                 | Fw_Amp      | CAGCGATCTGTCTATTTTCGTTCA    |
| Amp                 | Rev_Amp     | GCTATGTGGCGCGGTATTAT        |
| Cas9                | Fw_Cas9     | GTGGACGAGGTGGCCTA           |
| Cas9                | Rev_Cas9    | GGTGCTCGTCGTATCTCTTG        |
| Puro                | Fw_Puro     | gagtacaagcccacggtg          |
| Puro                | Rev_Puro    | gctcgtagaaggggaggt          |
